# Supplementary material for: Brain clocks capture diversity and disparities in aging and dementia across geographically diverse populations
Source: PubMed Central journal article supplement (PMC11645278; doi:10.1038/s41591-024-03209-x), 2024-08-26
Supplement: 41591_2024_3209_MOESM1_ESM.pdf [file 41591_2024_3209_MOESM1_ESM.pdf]

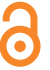

---

# Brain clocks capture diversity and disparities in aging and dementia across geographically diverse populations

---

In the format provided by the authors and unedited

---

### Supplementary Information

**Supplementary Table 1.** Results for gradient boosting regressions with sex and gender inequality as predictors. We conducted a two-sided F-test to evaluate the overall significance of the regression model.

$R^2 = 0.40$  (99% CI  $\pm 0.12$ ),  $F^2 = 0.66$  (99% CI  $\pm 0.14$ ), RMSE = 6.85 (99% CI  $\pm 0.82$ ),  $F = 352.54$ ,  $p < 1e-15$

| Predictors | Mean Shaps | CI [99%]      | Mean MDI | CI [99%]      | Permutation Importance | CI [99%]      |
|------------|------------|---------------|----------|---------------|------------------------|---------------|
| NCD        | 4.484      | [4.107-4.861] | 0.738    | [0.704-0.772] | 0.769                  | [0.762-0.776] |
| GII        | 0.894      | [0.825-0.963] | 0.048    | [0.041-0.055] | 0.158                  | [0.153-0.163] |
| Region     | 0.629      | [0.56-0.697]  | 0.018    | [0.014-0.022] | 0.034                  | [0.031-0.037] |
| Sex        | 0.601      | [0.527-0.68]  | 0.027    | [0.022-0.032] | 0.039                  | [0.037-0.041] |

Note: NCD = neurocognitive disorders (HC vs. MCI, AD or bvFTD), GII = The Gender Inequality index, Region = Latin-American and Caribbean countries (LAC) vs non-LAC.

**Supplementary Table 2.** Results for gradient boosting regressions. We conducted a two-sided F-test to evaluate the overall significance of the regression model.

A. Models with the total dataset:  $R^2 = 0.415$  (99% CI  $\pm 0.12$ ),  $F^2 = 0.71$  (99% CI  $\pm 0.14$ ), RMSE = 6.755 (99% CI  $\pm 0.89$ ),  $F = 253.39$ ,  $p < 1e-15$

| Predictors | Mean SHAPS | CI [99%]      | Mean MDI | CI [99%]      | Permutation Importance | CI [99%]      |
|------------|------------|---------------|----------|---------------|------------------------|---------------|
| NCD        | 4.234      | [3.847-4.621] | 0.743    | [0.712-0.774] | 0.753                  | [0.746-0.76]  |
| GINI       | 1.241      | [1.15-1.332]  | 0.081    | [0.073-0.089] | 0.157                  | [0.15-0.164]  |
| Pollution  | 0.386      | [0.339-0.433] | 0.013    | [0.009-0.017] | 0.037                  | [0.034-0.04]  |
| NCDs       | 0.219      | [0.181-0.257] | 0.005    | [0.003-0.007] | 0.029                  | [0.027-0.031] |
| CMMN       | 0.178      | [0.147-0.209] | 0.004    | [0.002-0.006] | 0.024                  | [0.022-0.026] |

B. Models with the LAC dataset:  $R^2 = 0.37$  (99% CI  $\pm 0.17$ ),  $F^2 = 0.588$  (99% CI  $\pm 0.21$ ), RMSE = 6.9 (99% CI  $\pm 0.92$ ),  $F = 138.78$ ,  $p < 1e-15$

| Predictors | Mean SHAPS | CI [99%]     | Mean MDI | CI [99%]      | Permutation Importance | CI [99%]      |
|------------|------------|--------------|----------|---------------|------------------------|---------------|
| NCD        | 4.021      | [3.56-4.482] | 0.739    | [0.697-0.781] | 0.751                  | [0.743-0.759] |
| GINI       | 1.378      | [1.24-1.519] | 0.11     | [0.097-0.123] | 0.157                  | [0.15-0.164]  |
| CMMN       | 0.287      | [0.235-0.34] | 0.006    | [0.003-0.009] | 0.024                  | [0.022-0.026] |
| Pollution  | 0.284      | [0.25-0.32]  | 0.018    | [0.012-0.024] | 0.042                  | [0.039-0.045] |
| NCDs       | 0.257      | [0.21-0.305] | 0.005    | [0.003-0.007] | 0.026                  | [0.024-0.028] |

C. Models with the non-LAC dataset:  $R^2 = 0.41$  (99% CI  $\pm 0.17$ ),  $F^2 = 0.71$  (99% CI  $\pm 0.21$ ), RMSE = 6.6 (99% CI  $\pm 1.31$ ),  $F = 135.91$ ,  $p < 1e-15$

| Predictors | Mean SHAPS | CI [99%]      | Mean MDI | CI [99%]      | Permutation Importance | CI [99%]      |
|------------|------------|---------------|----------|---------------|------------------------|---------------|
| NCD        | 4.983      | [4.536-5.43]  | 0.87     | [0.821-0.919] | 0.963                  | [0.959-0.967] |
| NCDs       | 0.246      | [0.16-0.33]   | 0.004    | [0.001-0.007] | 0.01                   | [0.006-0.014] |
| Pollution  | 0.231      | [0.15-0.308]  | 0.006    | [0.002-0.01]  | 0.016                  | [0.012-0.02]  |
| GINI       | 0.184      | [0.111-0.257] | 0.004    | [0.002-0.006] | 0.009                  | [0.005-0.013] |
| CMMN       | 0.063      | [0.034-0.092] | 0.001    | [0.0-0.002]   | 0.002                  | [0.001-0.003] |

Note: NCD = neurocognitive disorders (HC vs. MCI, AD or bvFTD), NCDs = non-communicable diseases, CMMN = communicable diseases.

**Supplementary Table 3.** Covariance analysis for years of education and age. We conducted an ANOVA analysis using a Type II sum of squares approach to evaluate the significance of predictors.

| Comparisons | A. HC LAC vs. HC non-LAC         |     |          |          | B. AD LAC vs. AD non-LAC      |     |          |          |
|-------------|----------------------------------|-----|----------|----------|-------------------------------|-----|----------|----------|
| Predictors  | Sum squares                      | df  | F        | p value  | Sum squares                   | df  | F        | p value  |
| Group       | 601.0433                         | 1   | 15.32718 | 0.000104 | 2427.091                      | 1   | 54.61552 | <1e-15   |
| Education   | 31.76629                         | 1   | 0.810071 | 0.368569 | 8.825269                      | 1   | 0.19859  | 0.655959 |
| Age         | 145.4403                         | 1   | 3.708868 | 0.054739 | 64.49888                      | 1   | 1.451384 | 0.228594 |
| Residual    | 18077.75                         | 461 |          |          | 43995.18                      | 990 |          |          |
| Comparisons | C. HC non-LAC vs. AD non-LAC     |     |          |          | D. HC non-LAC vs. MCI non-LAC |     |          |          |
| Predictors  | Sum squares                      | df  | F        | p value  | Sum squares                   | df  | F        | p value  |
| Group       | 22222.13                         | 1   | 583.1485 | <1e-15   | 9584.242                      | 1   | 291.6454 | <1e-15   |
| Education   | 14.52674                         | 1   | 0.381208 | 0.537166 | 19.72451                      | 1   | 0.600211 | 0.438886 |
| Age         | 83.90817                         | 1   | 2.2019   | 0.138307 | 8.202627                      | 1   | 0.249603 | 0.617587 |
| Residual    | 25760.44                         | 676 |          |          | 15511.17                      | 472 |          |          |
| Comparisons | E. HC non-LAC vs. bvFTD non-LAC  |     |          |          | F. HC LAC vs. AD LAC          |     |          |          |
| Predictors  | Sum squares                      | df  | F        | p value  | Sum squares                   | df  | F        | p value  |
| Group       | 10778.54                         | 1   | 298.5478 | <1e-15   | 22427.48                      | 1   | 477.9453 | <1e-15   |
| Education   | 8.502628                         | 1   | 0.235509 | 0.627813 | 23.13814                      | 1   | 0.49309  | 0.482763 |
| Age         | 701.7014                         | 1   | 19.43598 | 1.44E-05 | 73.81414                      | 1   | 1.573031 | 0.210146 |
| Residual    | 11155.89                         | 309 |          |          | 36366.71                      | 775 |          |          |
| Comparisons | G. HC LAC vs. MCI LAC            |     |          |          | H. HC LAC vs. bvFTD LAC       |     |          |          |
| Predictors  | Sum squares                      | df  | F        | p value  | Sum squares                   | df  | F        | p value  |
| Group       | 1103.314                         | 1   | 23.05894 | 2.49e-06 | 14950.29                      | 1   | 299.525  | <1e-15   |
| Education   | 3.553817                         | 1   | 0.074274 | 0.785401 | 15.30054                      | 1   | 0.306542 | 0.580148 |
| Age         | 20.86055                         | 1   | 0.435979 | 0.509578 | 15.30196                      | 1   | 0.306571 | 0.58013  |
| Residual    | 14306.42                         | 299 |          |          | 18268.27                      | 366 |          |          |
| Comparisons | I. MCI non-LAC versus AD non-LAC |     |          |          | J. MCI LAC versus AD LAC      |     |          |          |
| Predictors  | Sum squares                      | df  | F        | p value  | Sum squares                   | df  | F        | p value  |
| Group       | 2450.071                         | 1   | 60.16342 | 2.9e-14  | 2076.59                       | 1   | 45.74226 | 3.4e-11  |
| Education   | 0.175965                         | 1   | 0.004321 | 0.947607 | 11.54885                      | 1   | 0.254393 | 0.614197 |
| Age         | 135.9108                         | 1   | 3.337398 | 0.068124 | 2.203579                      | 1   | 0.04854  | 0.825705 |
| Residual    | 30135.46                         | 740 |          |          | 25422.67                      | 560 |          |          |

**Supplementary Table 4.** Resting-state fMRI acquisition parameters per center and scanner

| Location     | Scanner<br>Model Tesla     | TR<br>(ms) | TE<br>(ms) | Voxel size<br>(mm) | N°<br>vol | Matrix<br>dimension | N°<br>slices | Duration<br>(min) |
|--------------|----------------------------|------------|------------|--------------------|-----------|---------------------|--------------|-------------------|
| AR Center A  | Philips Ingenia 3T         | 2640       | 30         | 3x3x3              | 220       | 80x80               | 49           | 10                |
| AR Center B  | Philips Achieva 1.5T       | 2780       | 30         | 3.6x3.6x4          | 209       | 64x64               | 33           | 10                |
| AR Center C  | GE Signa Explorer 1.5T     | 2500       | 30         | 3.7x3.7x5          | 120       | 64x64               | 33           | 5                 |
| CH Center A  | Siemens Skyra 3T           | 2660       | 30         | 3x3x3              | 300       | 76x76               | 46           | 10                |
| CH Center B  | Siemens Skyra 3T           | 2660       | 30         | 3x3x3              | 240       | 76x76               | 46           | 10                |
| CH Center D  | Siemens Avanto 1.5T        | 3300       | 50         | 3.5X3.5X3.7        | 190       | 64X64               | 36           | 10                |
| CH Center I  | Philips Ingenia 3T         | 4970       | 30         | 2.5x2.5x2.7        | 121       | 96x96               | 45           | 10                |
| CH Center J  | Philips Ingenia 3T         | 4970       | 30         | 2.5x2.5x2.7        | 121       | 96x96               | 45           | 10                |
| CO Center A  | Philips Achieva 3T         | 4000       | 30         | 2.8x2.8x3          | 150       | 80x80               | 40           | 10                |
| CO Center B  | Philips Achieva 3T         | 3000       | 30         | 3.3x3.3x3.3        | 197       | 64x64               | 48           | 10                |
| CO Center C  | Philips Achieva 3T         | 3000       | 30         | 3x3x3              | 160       | 80x80               | 40           | 8                 |
| CO Center D  | Siemens 3T                 | 2510       | 30         | 3x3x3              | 240       | 70x70               | 45           | 8                 |
| MX Center D  | Philips Achieva 1.5T       | 3500       | 32         | 2.2x2.2x2.7        | 120       | 94x94               | 66           | 7                 |
| US Center 1  | Philips Achieva 3T         | 3000       | 30         | 2.5x2.5x3.3        | 197       | 96x96               | 47           | 10                |
| US Center 2  | Philips Achieva 3T         | 3000       | 30         | 3.3x3.3x3.3        | 140       | 64X64               | 48           | 7                 |
| US Center 3  | Philips Achieva 3T         | 3000       | 30         | 3.3x3.3x3.3        | 197       | 64X64               | 48           | 10                |
| US Center 4  | Philips Achieva 3T         | 3000       | 30         | 3.3x3.3x3.3        | 197       | 64X64               | 48           | 10                |
| US Center 5  | Philips Achieva 3T         | 3000       | 30         | 3.3x3.3x3.3        | 197       | 64X64               | 48           | 10                |
| US Center 6  | Philips Achieva dStream 3T | 3000       | 30         | 3.3x3.3x3.3        | 197       | 64X64               | 48           | 10                |
| US Center 7  | Philips Achieva dStream 3T | 3000       | 30         | 3.3x3.3x3.3        | 197       | 64X64               | 48           | 10                |
| US Center 8  | Siemens Biograph mMR 3T    | 3000       | 30         | 3.4x3.4x3.4        | 197       | 64X64               | 48           | 10                |
| US Center 9  | GE Discovery MR750 3T      | 3000       | 30         | 3.4x3.4x3.4        | 200       | 64X64               | 48           | 10                |
| US Center 10 | GE Discovery MR750 3T      | 3000       | 30         | 3.4x3.4x3.4        | 200       | 64X64               | 48           | 10                |
| US Center 11 | GE Discovery MR750 3T      | 3000       | 30         | 3.4x3.4x3.4        | 200       | 64X64               | 48           | 10                |
| US Center 12 | GE Discovery MR750 3T      | 3000       | 30         | 3.4x3.4x3.4        | 200       | 64X64               | 48           | 10                |
| US Center 14 | GE Discovery MR750 3T      | 3000       | 30         | 3.4x3.4x3.4        | 200       | 64X64               | 48           | 10                |
| US Center 16 | GE Discovery MR750 3T      | 3000       | 30         | 3.4x3.4x3.4        | 200       | 64X64               | 48           | 10                |
| US Center 17 | GE Discovery MR750 3T      | 3000       | 30         | 3.4x3.4x3.4        | 200       | 64X64               | 48           | 10                |
| US Center 18 | GE Discovery MR750 3T      | 3000       | 30         | 3.4x3.4x3.4        | 200       | 64X64               | 48           | 10                |

|              |                       |      |    |             |     |       |    |    |
|--------------|-----------------------|------|----|-------------|-----|-------|----|----|
| US Center 19 | Philips Ingenia 3T    | 3000 | 30 | 3.4x3.4x3.4 | 197 | 64X64 | 48 | 10 |
| US Center 20 | Philips Ingenia 3T    | 3000 | 30 | 3.4x3.4x3.4 | 197 | 64X64 | 48 | 10 |
| US Center 21 | Philips Ingenia 3T    | 3000 | 30 | 3.4x3.4x3.4 | 197 | 64X64 | 48 | 10 |
| US Center 22 | Philips Ingenia 3T    | 3000 | 30 | 3.4x3.4x3.4 | 197 | 64X64 | 48 | 10 |
| US Center 23 | Philips Ingenia 3T    | 3000 | 30 | 3.3x3.3x3.3 | 140 | 64X64 | 48 | 7  |
| US Center 24 | Philips Ingenia 3T    | 3000 | 30 | 3.4x3.4x3.4 | 197 | 64X64 | 48 | 10 |
| US Center 25 | Siemens Prisma 3T     | 607  | 32 | 2.5x2.5x2.5 | 976 | 88x88 | 64 | 10 |
| US Center 26 | Siemens Prisma 3T     | 607  | 32 | 2.5x2.5x2.5 | 976 | 88x88 | 64 | 10 |
| US Center 27 | Siemens Prisma 3T     | 607  | 32 | 2.5x2.5x2.5 | 976 | 88x88 | 64 | 10 |
| US Center 28 | Siemens Prisma 3T     | 3000 | 30 | 3.4x3.4x3.4 | 197 | 64X64 | 48 | 10 |
| US Center 29 | Siemens Prisma 3T     | 3000 | 30 | 3.4x3.4x3.4 | 197 | 64X64 | 48 | 10 |
| US Center 30 | Siemens Prisma 3T     | 607  | 32 | 2.5x2.5x2.5 | 976 | 88x88 | 64 | 10 |
| US Center 31 | Siemens Prisma 3T     | 3000 | 30 | 3.4x3.4x3.4 | 197 | 64X64 | 48 | 10 |
| US Center 32 | Siemens Prisma 3T     | 3000 | 30 | 3.4x3.4x3.4 | 197 | 64X64 | 48 | 10 |
| US Center 33 | Siemens Prisma_Fit 3T | 3000 | 30 | 3.4x3.4x3.4 | 197 | 64X64 | 48 | 10 |
| US Center 34 | Siemens Prisma_Fit 3T | 607  | 32 | 2.5x2.5x2.5 | 976 | 88x88 | 64 | 10 |
| US Center 35 | Siemens Prisma_Fit 3T | 3000 | 30 | 3.4x3.4x3.4 | 197 | 64X64 | 48 | 10 |
| US Center 36 | Siemens Prisma_Fit 3T | 3000 | 30 | 3.4x3.4x3.4 | 197 | 64X64 | 48 | 10 |
| US Center 37 | Siemens Prisma_Fit 3T | 3000 | 30 | 3.4x3.4x3.4 | 197 | 64X64 | 48 | 10 |
| US Center 38 | Siemens Prisma_Fit 3T | 3000 | 30 | 3.4x3.4x3.4 | 197 | 64X64 | 48 | 10 |
| US Center 39 | Siemens Prisma_Fit 3T | 607  | 32 | 2.5x2.5x2.5 | 976 | 88x88 | 64 | 10 |
| US Center 40 | Siemens Prisma_Fit 3T | 607  | 32 | 2.5x2.5x2.5 | 976 | 88x88 | 64 | 10 |
| US Center 41 | Siemens Prisma_Fit 3T | 607  | 32 | 2.5x2.5x2.5 | 976 | 88x88 | 64 | 10 |
| US Center 42 | Siemens Prisma_Fit 3T | 3000 | 30 | 3.4x3.4x3.4 | 197 | 64X64 | 48 | 10 |
| US Center 43 | Siemens Prisma_Fit 3T | 3000 | 30 | 3.4x3.4x3.4 | 197 | 64X64 | 48 | 10 |
| US Center 44 | Siemens Prisma_Fit 3T | 607  | 32 | 2.5x2.5x2.5 | 976 | 88x88 | 64 | 10 |
| US Center 45 | Siemens Prisma_Fit 3T | 3000 | 30 | 3.4x3.4x3.4 | 197 | 64X64 | 48 | 10 |
| US Center 46 | Siemens Prisma_Fit 3T | 3000 | 30 | 3.4x3.4x3.4 | 197 | 64X64 | 48 | 10 |
| US Center 47 | GE Signa HDxt 3T      | 2925 | 30 | 3.3x3.3x3.3 | 160 | 64X64 | 48 | 8  |
| US Center 48 | GE Signa HDxt 3T      | 3000 | 30 | 3.4x3.4x3.4 | 200 | 64X64 | 48 | 10 |
| US Center 49 | GE Signa HDxt 3T      | 3000 | 30 | 3.3x3.3x3.3 | 200 | 64X64 | 48 | 10 |
| US Center 50 | GE Signa HDxt 3T      | 3000 | 30 | 3.3x3.3x3.3 | 200 | 64X64 | 48 | 10 |

|              |                       |      |    |             |     |         |    |    |
|--------------|-----------------------|------|----|-------------|-----|---------|----|----|
| US Center 51 | Siemens Skyra 3T      | 3000 | 30 | 3.4x3.4x3.4 | 197 | 64X64   | 48 | 10 |
| US Center 52 | Siemens Skyra 3T      | 788  | 33 | 2.7x2.7x2.5 | 750 | 88x88   | 64 | 10 |
| US Center 53 | Siemens TrioTim 3T    | 3000 | 30 | 3.4x3.4x3.4 | 197 | 64X64   | 48 | 10 |
| US Center 54 | Siemens TrioTim 3T    | 3000 | 30 | 3.4x3.4x3.4 | 197 | 64X64   | 48 | 10 |
| US Center 55 | Siemens TrioTim 3T    | 3000 | 30 | 3.4x3.4x3.4 | 197 | 64X64   | 48 | 10 |
| US Center 56 | Siemens TrioTim 3T    | 3000 | 30 | 3.4x3.4x3.4 | 197 | 64X64   | 48 | 10 |
| US Center 57 | Siemens Verio 3T      | 3000 | 30 | 3.4x3.4x3.4 | 197 | 64X64   | 48 | 10 |
| US Center 58 | Siemens Verio 3T      | 3000 | 30 | 3.4x3.4x3.4 | 197 | 64X64   | 48 | 10 |
| US Center 60 | Siemens Verio 3T      | 3000 | 30 | 3.4x3.4x3.4 | 197 | 64X64   | 43 | 10 |
| US Center 61 | Siemens Verio 3T      | 3000 | 30 | 3.4x3.4x3.4 | 197 | 64X64   | 48 | 10 |
| US Center 62 | Siemens TrioTim 3T    | 2000 | 27 | 2.5x2.5x3.6 | 240 | 92x92   | 36 | 8  |
| US Center 63 | Siemens TrioTim 3T    | 2000 | 27 | 2.5x2.5x3.6 | 240 | 92x92   | 36 | 8  |
| US Center 64 | GE Signa HDxt 3T      | 2770 | 27 | 1.8x1.8x3.6 | 240 | 128x128 | 36 | 11 |
| US Center 65 | GE Discovery MR750 3T | 2770 | 27 | 1.8x1.8x3.6 | 240 | 128x128 | 46 | 11 |
| US Center 66 | Siemens Prisma_Fit 3T | 8500 | 32 | 2.2x2.2x2.2 | 560 | 96x96   | 66 | 8  |
| US Center 67 | Siemens TrioTim 3T    | 2000 | 27 | 2.5x2.5x3.5 | 240 | 92x92   | 36 | 8  |
| US Center 68 | Siemens TrioTim 3T    | 2000 | 27 | 2.5x2.5x3.5 | 240 | 92x92   | 36 | 8  |

AR: Argentina, CH: Chile, CO: Colombia, MX: Mexico, TE: echo time, TR: repetition time, US: United States.

**Supplementary Table 5.** EEG acquisition parameters

| Center                              | Time      | Eyes                      | Equipment                                     | Channels             | Ref.               | Filter       | Sampling rate |
|-------------------------------------|-----------|---------------------------|-----------------------------------------------|----------------------|--------------------|--------------|---------------|
| Centro de Neurociencias de Cuba (2) | 2-20 min  | Closed                    | Digital Electroencephalography system MEDICID | 64/128 Passive       | Linked earlobe     | 0.5-50 Hz    | 200 Hz        |
| BrainLat (3,4)                      | 5-25 min  | Closed                    | Biosemi ADBOX-MODEL                           | 128 Active           | Mastoids           | 0.16-100 Hz  | 2048 Hz       |
| Izmir University of Economics       | 7-10 min  | Closed 4 mi<br>Open 4 min | BrainAmp                                      | 32 Passive           | A1 + A2 Electrodes | 0.03-70 Hz   | 500 Hz        |
| Trinity College Dublin              | 3-12 min  | Closed                    | Two Biosemi system                            | 264+7 sensors Active | Average            | 0.1-95 Hz    | 512 Hz        |
| Universidad de Antioquia            | 5-8 min   | Closed                    | Neuroscan Synamps 2                           | 72 Passive           | Vertex             | 0.1-200 Hz   | 200 Hz        |
|                                     | 7-18 min  | Closed                    | Neuroscan Synamps 2                           | 72 Passive           | Right mastoid      | 0.1-200 Hz   | 1024 Hz       |
| Universidad de Sao (5)              | 10-26 min | Closed                    | Braintech 3.0                                 | 21 Passive           | unknown            | 1-60 Hz      | 200 Hz        |
| Sapienza Università di Roma         | 8-14 min  | Closed 5 mi<br>Open 5 min | Brain Amp                                     | 61 Passive           | Fcz Electrode      | Highpass 0.0 | 1000 Hz       |
| University of Strathclyde           | 5-13 min  | Closed                    | Two Biosemi system                            | 64 Active            | Left and right r   | 0.1-35 Hz    | 512 Hz        |
| Istanbul Medipol University         | 2-11 min  | Closed 4 mi<br>Open 4 min | Brain Amp                                     | 32 Passive           | A1 + A2 Electr     | 0.01-250 Hz  | 500 Hz        |
| Takeda                              | 7-8 min   | Closed                    | Two Biosemi system                            | 132 Active           | Left and right r   | unknown      | 1024 Hz       |

**Supplementary Data 1.** Details on fMRI and EEG data availability

| Dataset                                                                | Country                                  | Data obtained from   | How to obtain individual data                                                                                                                                           | MRI (1)<br>fMRI(2)<br>EEG(3) |
|------------------------------------------------------------------------|------------------------------------------|----------------------|-------------------------------------------------------------------------------------------------------------------------------------------------------------------------|------------------------------|
| ReDLat pros                                                            | Argentina, Chile, Colombia, Mexico, Peru | Agustín Ibañez       | Contact <a href="mailto:agustin.ibanez@gbhi.org">agustin.ibanez@gbhi.org</a> . An IRB approval and formal data sharing agreement is required.                           | (1) - (2)                    |
| Alzheimer's Disease Neuroimaging Initiative (ADNI)                     | USA                                      | ADI - LONI           | <a href="https://ida.loni.usc.edu/collaboration/access/appLicense.jsp">https://ida.loni.usc.edu/collaboration/access/appLicense.jsp</a>                                 | (1) - (2)                    |
| Centro de Gerociencia, Salud Mental y Metabolismo (GERO)               | Chile                                    | Andrea Slavcheshky   | Contact <a href="mailto:andrea.slavcheshky@uchile.cl">andrea.slavcheshky@uchile.cl</a> . An IRB approval and formal data sharing agreement is required.                 | (1) - (2)                    |
| Chinese Human Connectome Project (CHCP)                                | China                                    | Science data bank    | <a href="https://www.scidb.cn/en/detail?dataSetId=f512d085f3d3452a9b14689e9997ca94#p2">https://www.scidb.cn/en/detail?dataSetId=f512d085f3d3452a9b14689e9997ca94#p2</a> | (1) - (2)                    |
| The frontotemporal lobar degeneration neuroimaging initiative (FTLDNI) | USA                                      | ADI - LONI           | <a href="https://ida.loni.usc.edu/collaboration/access/appLicense.jsp">https://ida.loni.usc.edu/collaboration/access/appLicense.jsp</a>                                 | (1) - (2)                    |
| ReDLat miller                                                          | USA                                      | Bruce Miller - UCSF  | Visit <a href="https://data.ucsf.edu/data-sharing">https://data.ucsf.edu/data-sharing</a> or email <a href="mailto:datasharing@ucsf.edu">datasharing@ucsf.edu</a>       | (1) - (2)                    |
| ReDLat pre                                                             | Argentina                                | Agustín Ibañez       | Contact <a href="mailto:agustin.ibanez@gbhi.org">agustin.ibanez@gbhi.org</a> . An IRB approval and formal data sharing agreement is required.                           | (1) - (2)                    |
| ReDLat pre                                                             | Peru                                     | Nilton Custodio      | Contact <a href="mailto:ncustodio@ipn.pe">ncustodio@ipn.pe</a> . An IRB approval and formal data sharing agreement is required.                                         | (1) - (2)                    |
| ReDLat pre                                                             | Colombia                                 | Diana Matallana      | Contact <a href="mailto:dianamat@javeriana.edu.co">dianamat@javeriana.edu.co</a> . An IRB approval and formal data sharing agreement is required.                       | (1) - (2)                    |
| ReDLat pre                                                             | Colombia                                 | Felipe Cardona       | Contact <a href="mailto:felipe.cardona@correounivalle.edu.co">felipe.cardona@correounivalle.edu.co</a> . An IRB approval and formal data sharing agreement is required. | (1) - (2)                    |
| ReDLat pre                                                             | Mexico                                   | Ana Luisa Sosa       | Contact <a href="mailto:drasosa@hotmail.com">drasosa@hotmail.com</a> . An IRB approval and formal data sharing agreement is required.                                   | (1) - (2)                    |
| ReDLat pre                                                             | Chile                                    | María Isabel Behrens | Contact <a href="mailto:behrensl@uchile.cl">behrensl@uchile.cl</a> . An IRB approval and formal data sharing agreement is required.                                     | (1) - (2)                    |



|                                                                                |           |                                         |                                                                                                                                                       |           |
|--------------------------------------------------------------------------------|-----------|-----------------------------------------|-------------------------------------------------------------------------------------------------------------------------------------------------------|-----------|
| ReDLat pre                                                                     | Chile     | Andrea Slavchesky                       | Contact <a href="mailto:andrea.slachevsky@uchile.cl">andrea.slachevsky@uchile.cl</a> . An IRB approval and formal data sharing agreement is required. | (1) - (2) |
| Japanese Strategic Research Program for the Promotion of Brain Science (SRPBS) | Japan     | DecNef Project Brain Data Repository    | <a href="https://bicr-resource.atr.jp/srpbsopen/">https://bicr-resource.atr.jp/srpbsopen/</a>                                                         | (1) - (2) |
| Centro de Neurociencias de Cuba                                                | Cuba      | Centro de Neurociencias de Cuba (CHBMP) | <a href="http://www.synapse.org/Synapse:syn22324937">www.synapse.org/Synapse:syn22324937</a>                                                          | (3) -     |
| BrainLat                                                                       | Argentina | Agustina Legaz                          | Contact <a href="mailto:alegaz@udesa.edu.ar">alegaz@udesa.edu.ar</a>                                                                                  | (3) -     |
| BrainLat                                                                       | Chile     | Agustina Legaz                          | Contact <a href="mailto:alegaz@udesa.edu.ar">alegaz@udesa.edu.ar</a>                                                                                  | (3) -     |
| Izmir University of Economics                                                  | Turkey    | Gorsev Gener                            | Contact <a href="mailto:gorsev.yener@ieu.edu.tr">gorsev.yener@ieu.edu.tr</a>                                                                          | (3) -     |
| Trinity College Dublin                                                         | Ireland   | Francesca Farina                        | Contact <a href="mailto:francesca.farina@northwestern.edu">francesca.farina@northwestern.edu</a>                                                      | (3) -     |
| Universidad de Antioquia                                                       | Colombia  | Francisco Lopera                        | Contact <a href="mailto:floperar@gmail.com">floperar@gmail.com</a>                                                                                    | (3) -     |
| Universidad de Sao Paulo                                                       | Brazil    | Mario Parra                             | Contact <a href="mailto:mario.parra-rodriiguez@strath.ac.uk">mario.parra-rodriiguez@strath.ac.uk</a>                                                  | (3) -     |
| Aristotle University of Thessaloniki                                           | Greece    | Andreas Miltiadous                      | <a href="https://openneuro.org/datasets/ds004504/versions/1.0.5">https://openneuro.org/datasets/ds004504/versions/1.0.5</a>                           | (3) -     |
| Universidad de Roma La Sapienza                                                | Italy     | Susana Lopez                            | Contact <a href="mailto:susanna.lopez@uniroma1.it">susanna.lopez@uniroma1.it</a>                                                                      | (3) -     |
| University of Strathclyde                                                      | UK        | Mario Parra                             | Contact <a href="mailto:mario.parra-rodriiguez@strath.ac.uk">mario.parra-rodriiguez@strath.ac.uk</a>                                                  | (3) -     |
| Istanbul Medipol University                                                    | Turkey    | Tuba Aktürk                             | Contact <a href="mailto:takturk@medipol.edu.tr">takturk@medipol.edu.tr</a>                                                                            | (3) -     |
| Takeda                                                                         | Chile     | Daniela Olivares                        | Contact <a href="mailto:danielaolivaresvargas@gmail.com">danielaolivaresvargas@gmail.com</a>                                                          | (3) -     |
